# Supplementary material for: Contrast-induced acute kidney injury and adverse clinical outcomes risk in acute coronary syndrome patients undergoing percutaneous coronary intervention: a meta-analysis
Source: PubMed Central journal article supplement (PMC6303898; doi:10.1186/s12882-018-1161-5), 2018-12-22
Supplement: 12882_2018_1161_MOESM2_ESM.pdf [file 12882_2018_1161_MOESM2_ESM.pdf]

**Additional file 2** Search strategy to identify studies

**On Pubmed**

Search (((((((((((((((((((mortality) OR cardiovascular) OR events) OR death) OR outcome) OR Hemodialysis) OR Haemodialysis) OR Dialysis) OR Adverse effect) OR prognosis) OR chronic kidney disease) OR CKD) OR end-stage renal disease) OR ESRD)) OR peritoneal dialysis)) AND (((((((((((((((((((acute myocardial infarction) OR AMI) OR myocardial infarction) OR MI) OR non-ST segment elevation myocardial infarction) OR ST-segment elevation myocardial infarction) OR acute coronary syndrome) OR ACS) OR unstable angina) OR acute ST-elevation myocardial infarction) OR acute non-ST segment elevation myocardial infarction)) AND (((complete revascularization) OR revascularization) OR percutaneous coronary intervention) OR PCI)) AND (((contrast-induced acute kidney injury) OR contrast-induced nephropathy) OR contrast media use) OR CIN) OR CI-AKI)

**On Web of science™**

TOPIC:((((((((((((((((((((mortality) OR cardiovascular) OR events) OR death) OR outcome) OR Hemodialysis) OR Haemodialysis) OR Dialysis) OR Adverse effect) OR prognosis) OR chronic kidney disease) OR CKD) OR end-stage renal disease) OR ESRD)) OR peritoneal dialysis)) AND (((((((((((((((((((acute myocardial infarction) OR AMI) OR myocardial

infarction) OR MI) OR non-ST segment elevation myocardial infarction)  
OR ST-segment elevation myocardial infarction) OR acute coronary  
syndrome) OR ACS) OR unstable angina) OR acute ST-elevation  
myocardial infarction) OR acute non-ST segment elevation myocardial  
infarction)) AND (((complete revascularization) OR revascularization)  
OR percutaneous coronary intervention) OR PCI)) AND (((contrast-  
induced acute kidney injury) OR contrast-induced nephropathy) OR  
contrast media use) OR CIN) OR CI-AKI))

### **On Cochrane library**

#1: acute myocardial infarction

#2: AMI

#3: myocardial infarction

#4: MI

#5: non-ST segment elevation myocardial infarction

#6: ST-segment elevation myocardial infarction

#7: acute coronary syndrome

#8: ACS

#9: unstable angina

#10: acute ST-elevation myocardial infarction

#11: acute non-ST segment elevation myocardial infarction

#12: complete revascularization

#13: revascularization

#14: percutaneous coronary intervention

#15: PCI

#16: contrast-induced acute kidney injury

#17: contrast-induced nephropathy

#18: contrast media use

#19: CIN

#20: CI-AKI

#21: mortality

#22: cardiovascular

#23: events

#24: death

#25: outcome

#26: Hemodialysis

#27: Haemodialysis

#28: Dialysis

#29: peritoneal dialysis

#30: Adverse effect

#31: prognosis

#32: chronic kidney disease

#33: CKD

#34: end-stage renal disease

#35: ESRD

#36: #1 or #2 or #3 or #4 or #5 or #6 or #7 or #8 or #9 or #10 or #11 or  
#12 or #13 or #14 or #15

#37: #16 or #17 or #18 or #19 or #20

#38: #21 or #22 or #23 or #24 or #25 or #26 or # 27 or #28 or #29 or #30  
or #31 or #32 or #33 or #34 or #35

#39: #36 and #37 and #38

We choose #39

We choose “trials”

### **On EMBASE**

#1: acute myocardial infarction

#2: AMI

#3: myocardial infarction

#4: MI

#5: non-ST segment elevation myocardial infarction

#6: ST-segment elevation myocardial infarction

#7: acute coronary syndrome

#8: ACS

#9: unstable angina

#10: acute ST-elevation myocardial infarction

#11: acute non-ST segment elevation myocardial infarction

#12: complete revascularization

#13: revascularization

#14: percutaneous coronary intervention

#15: PCI

#16: contrast-induced acute kidney injury

#17: contrast-induced nephropathy

#18: contrast media

#19: CIN

#20: CI-AKI

#21: mortality

#22: cardiovascular

#23: events

#24: death

#25: outcome

#26: Hemodialysis

#27: Haemodialysis

#28: Dialysis

#29: peritoneal dialysis

#30: Adverse effect

#31: prognosis

#32: chronic kidney disease

#33: CKD

#34: end-stage renal disease

#35: ESRD

#36: #1 or #2 or #3 or #4 or #5 or #6 or #7 or #8 or #9 or #10 or #11 or  
#12 or #13 or #14 or #15

#37: #16 or #17 or #18 or #19 or #20

#38: #21 or #22 or #23 or #24 or #25 or #26 or #27 or #28 or #29 or #30  
or #31 or #32 or #33 or #34 or #35

#39: #36 and #37 and #38

We choose #39
