# Supplementary material for: Contrast-induced acute kidney injury and adverse clinical outcomes risk in acute coronary syndrome patients undergoing percutaneous coronary intervention: a meta-analysis
Source: PubMed Central journal article supplement (PMC6303898; doi:10.1186/s12882-018-1161-5), 2018-12-22
Supplement: 12882_2018_1161_MOESM3_ESM.pdf [file 12882_2018_1161_MOESM3_ESM.pdf]

**Additional file 3** Other related characteristics of included studies

| Study                   | Baseline characteristic  |           |             |                                     |                   | Complication (%) |      |      |        | History (%) |       |       |             | Medication (%) |           |            |         |
|-------------------------|--------------------------|-----------|-------------|-------------------------------------|-------------------|------------------|------|------|--------|-------------|-------|-------|-------------|----------------|-----------|------------|---------|
|                         | BMI (kg/m <sup>2</sup> ) | LVE F (%) | Scr (mg/dl) | eGFR (ml/min /1.73 m <sup>2</sup> ) | Killip class ≥2,% | HT               | DM   | HLP  | Smoker | MI          | P-CBS | P-PCI | Famil y CAD | Aspir in       | ACEI /ARB | β-block er | Statins |
| Sadeghi et al. 2003     | -                        | -         | -           | -                                   | 10.6              | 48.0             | 16.9 | 38.0 | 43.3   | 13.3        | 1.9   | -     | -           | 99.0           | 45.5      | 87.4       | 31.4    |
| Uyarel et al. 2009      | -                        | 47.4      | 0.97        | -                                   | 6.1               | 39.3             | 24.6 | 34.5 | 57.9   | 10.6        | 2.9   | 8.0   | 16.2        |                |           |            |         |
| Wickenbrock et al. 2009 | -                        | 56.0      | 0.95        | -                                   | -                 | 82.7             | 24.5 | 77.6 | 40.8   | -           | 9.7   | -     | -           |                |           |            |         |
| Akkaya et al. 2010      | -                        | -         | 0.97        | -                                   | 6.0               | 39.5             | 24.2 | 36.7 | 62.2   | 11.8        | 2.9   | -     | 17.5        |                |           |            |         |
| Chong et al. 2011       | -                        | 48.3      | -           | -                                   | -                 | 58.8             | 34.5 | 76.3 | 52.5   | -           | -     | -     | 10.8        |                |           |            |         |
| Wi et al. 2012          | 24.1                     | 48.4      | 1.06        | -                                   | -                 | 49.0             | 26.0 | 38.0 | 38.0   | 6.0         | 2.0   | 13.0  | -           | 97.0           | 84.0      | 80.0       | 87.0    |
| Kume et al. 2013        | 23.9                     | -         | 0.86        | 73.7                                | 15.5              | 73.2             | 33.0 | 68.0 | -      | 5.2         | -     | -     |             | 13.4           | 21.6      | 9.3        | 16.5    |
| Lucreziotti et al. 2014 | 26.1                     | -         | 1.00        | 76.7                                | 13.0              | 52.3             | 17.0 | 33.1 | 42.7   | -           | -     | -     | 17.0        |                |           |            |         |
| Narula et al. 2014      | 27.0                     | -         | -           | -                                   | 8.8               | 53.1             | 16.4 | 42.7 | 64.1   | 10.7        | 2.9   | 10.8  | 30.6        | 97.7           | 81.5      | 89.7       | 94.2    |
| Watabe et al. 2014      | 24.0                     | 55.6      | -           | 68.1                                | 14.3              | 62.0             | 34.4 | 49.4 | 56.8   | 10.5        | 1.7   | 11.7  | -           | 23.9           | 29.2      | 16.1       | 17.0    |
| Akin et al. 2015        | -                        | 49.1      | 0.98        | 94.4                                | -                 | 36.8             | 25.7 | -    | 36.5   | 18.9        | 3.5   | -     | -           |                |           |            |         |
| Cicek et al. 2015       | -                        | 45.0      | 0.90        | -                                   | 6.4               | 41.3             | 19.7 | -    | -      | -           | -     | -     | -           |                |           |            |         |
| Crimi et al. 2015       | 26.6                     | 53.7      | 1.00        | 79.1                                | -                 | 71.7             | 24.2 | 54.0 | 24.1   | 26.3        | 10.5  | 18.2  | 27.9        |                |           |            |         |
| Giacoppo et al. 2015    | -                        | 61.1      |             | 64.9                                | -                 | 61.5             | 24.3 | 51.6 | 35.0   | 24.2        | 13.1  | 30.2  | -           | 98.2           | 39.7      | 62.9       | 44.8    |
| Turan et al. 2015       | 28.3                     | 52.0      | 1.04        | -                                   | 4.5               | 62.5             | 29.6 | 51.8 | 43.2   | -           | 10.6  | 14.1  | -           |                |           |            |         |
| Centola et al. 2016     | 26.1                     | -         | 1.00        | 115                                 | 13                | 53               | 16   | 33   | 44.0   | --          | -     | -     | -           |                |           |            |         |
| Farhan et al. 2016      | -                        | -         | 1.07        | -                                   | -                 | 70.3             | 22.6 | 73.7 | -      | 9.9         | -     | -     | -           |                | 59.3      |            |         |
| Gungor et al. 2016      | -                        | 46.8      | 0.88        | -                                   | -                 | 41.4             | 27.1 | 34.2 | 43.4   | 5.8         | -     | 7.8   | -           |                |           |            |         |
| Kuboyama et al. 2016    | -                        |           | 0.87        | 73.8                                | -                 | 66.8             | 36.8 | 64.4 | 70.5   | -           | -     | -     | 24.3        |                |           |            |         |

|                       |      |      |      |      |      |      |      |      |      |     |   |   |   |      |      |      |      |
|-----------------------|------|------|------|------|------|------|------|------|------|-----|---|---|---|------|------|------|------|
| Nakahashi et al. 2016 | 24.4 | -    | 0.88 | 70.9 | 9.5  | 56.2 | 25.8 | 60.1 | 71.2 | 2.1 | - | - | - | 99.5 | 83.5 | 66.9 | 69.8 |
| Park et al. 2016      | -    | 45.3 | 1.06 | -    | 25.9 | 51.6 | 30.1 | 24.7 | -    | -   | - | - | - |      |      |      |      |
| Park et al. 2016 (2)  | 24.4 | 52.8 | 0.84 | -    | -    | 46.4 | 25.7 | 6.3  | 68.0 | -   | - | - | - | 100  |      | 85.6 |      |

Abbreviations: BMI=body mass index; LVEF=left ventricular ejection fraction; Scr= serum creatinine; eGFR= estimated glomerular filtration rate; HT=hypertension; DM=diabetes mellitus; HLP=Hyperlipidemia; MI=myocardial infarction; P-PCS= Previous coronary bypass surgery; P-PCI= Previous percutaneous coronary intervention; CAD=coronary artery disease.
