# Supplementary material for: Contrast-induced acute kidney injury and adverse clinical outcomes risk in acute coronary syndrome patients undergoing percutaneous coronary intervention: a meta-analysis
Source: PubMed Central journal article supplement (PMC6303898; doi:10.1186/s12882-018-1161-5), 2018-12-22
Supplement: 12882_2018_1161_MOESM6_ESM.pdf [file 12882_2018_1161_MOESM6_ESM.pdf]

Meta-analysis random-effects estimates (exponential form)  
Study omitted

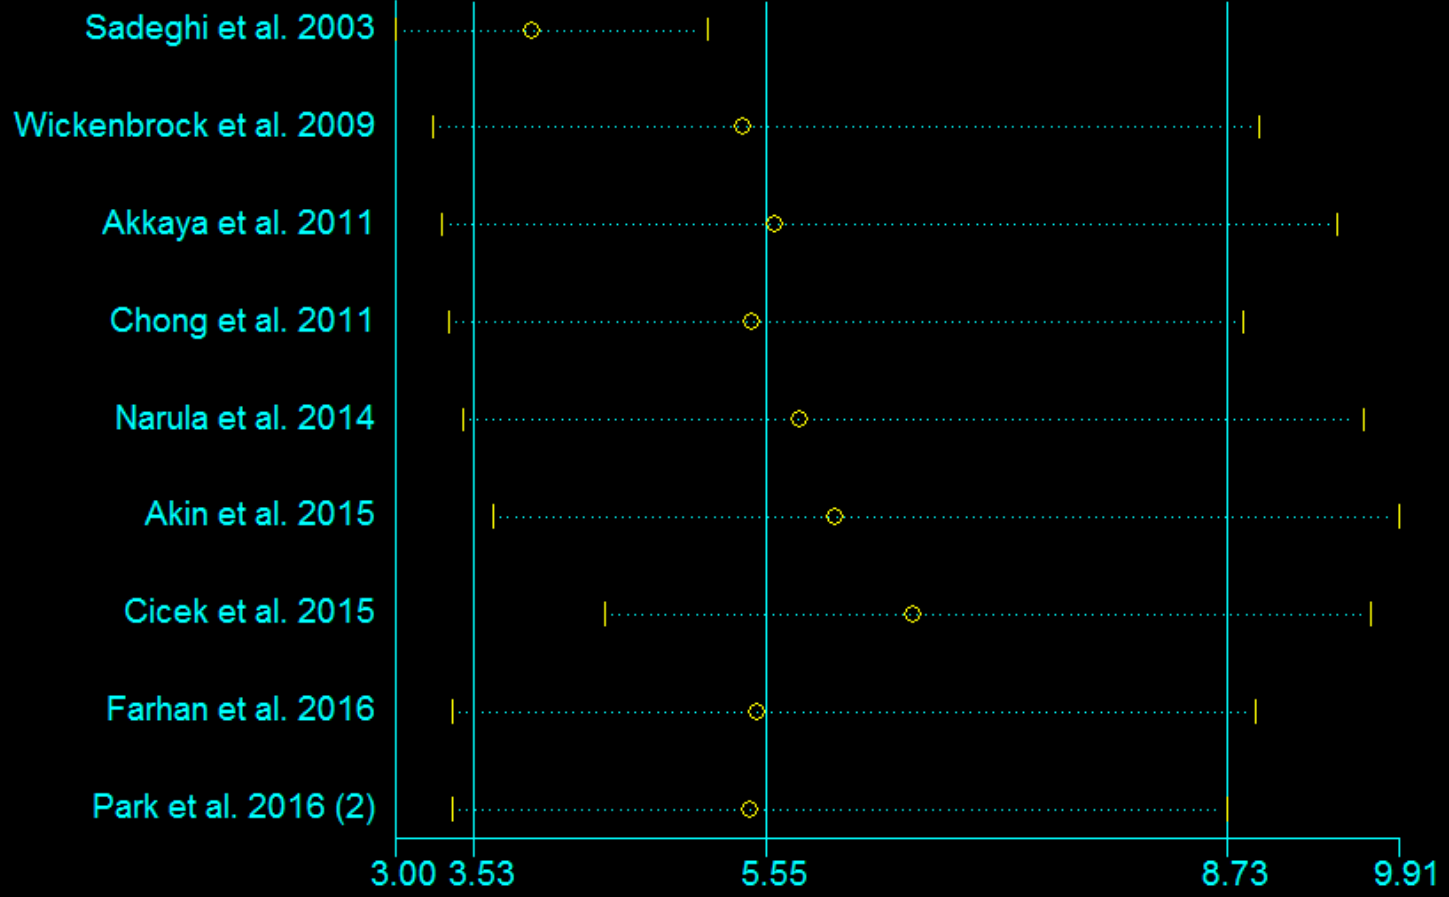

**Additional file 6: Sensitivity analysis for short-term all-cause mortality.**
