# Supplementary material for: Contrast-induced acute kidney injury and adverse clinical outcomes risk in acute coronary syndrome patients undergoing percutaneous coronary intervention: a meta-analysis
Source: PubMed Central journal article supplement (PMC6303898; doi:10.1186/s12882-018-1161-5), 2018-12-22
Supplement: 12882_2018_1161_MOESM10_ESM.pdf [file 12882_2018_1161_MOESM10_ESM.pdf]

## Additional file 10: Egger's test of all analysis

### All-cause mortality

$I^2 = 0.175$  (continuity corrected)

| Egger's test |          |           |      |       |                      |          |
|--------------|----------|-----------|------|-------|----------------------|----------|
| Std_Eff      | Coef.    | Std. Err. | t    | P> t  | [95% Conf. Interval] |          |
| slope        | .8457414 | .1961945  | 4.31 | 0.001 | .4298277             | 1.261655 |
| bias         | .9336245 | .706343   | 1.32 | 0.205 | -.5637557            | 2.431005 |

### Short-term all-cause mortality

| Egger's test |          |           |      |       |                      |          |
|--------------|----------|-----------|------|-------|----------------------|----------|
| Std_Eff      | Coef.    | Std. Err. | t    | P> t  | [95% Conf. Interval] |          |
| slope        | 1.054995 | .3991826  | 2.64 | 0.033 | .1110784             | 1.998912 |
| bias         | 1.478846 | 1.07418   | 1.38 | 0.211 | -1.061187            | 4.01888  |

### Major adverse cardiac events

$I^2 = 0.150$  (continuity corrected)

| Egger's test |          |           |      |       |                      |          |
|--------------|----------|-----------|------|-------|----------------------|----------|
| Std_Eff      | Coef.    | Std. Err. | t    | P> t  | [95% Conf. Interval] |          |
| slope        | .2769561 | .0568737  | 4.87 | 0.005 | .1307575             | .4231547 |
| bias         | 1.03511  | .4094685  | 2.53 | 0.053 | -.0174624            | 2.087682 |

### Major adverse cardiovascular and cerebrovascular events

| Egger's test |          |           |      |       |                      |          |
|--------------|----------|-----------|------|-------|----------------------|----------|
| Std_Eff      | Coef.    | Std. Err. | t    | P> t  | [95% Conf. Interval] |          |
| slope        | .170633  | .5643209  | 0.30 | 0.813 | -6.999743            | 7.341009 |
| bias         | 1.909615 | 2.366636  | 0.81 | 0.568 | -28.16134            | 31.98058 |

## Stent restenosis

Egger's test

| std_Eff | Coef.    | Std. Err. | t    | P> t  | [95% Conf. Interval] |          |
|---------|----------|-----------|------|-------|----------------------|----------|
| slope   | .0595918 | .2254548  | 0.26 | 0.835 | -2.805083            | 2.924266 |
| bias    | 2.077205 | 1.341045  | 1.55 | 0.365 | -14.96239            | 19.1168  |
