# Supplementary material for: Contrast-induced acute kidney injury and adverse clinical outcomes risk in acute coronary syndrome patients undergoing percutaneous coronary intervention: a meta-analysis
Source: BMC Nephrol. 2018 Dec 22;19:374. doi: 10.1186/s12882-018-1161-5 (PMC6303898; doi:10.1186/s12882-018-1161-5)
Supplement: Supplementary file 5 — Sensitivity analysis for all-cause mortality. (PDF 106 kb) [file 12882_2018_1161_MOESM5_ESM.pdf]

Meta-analysis random-effects estimates (exponential form)  
Study omitted

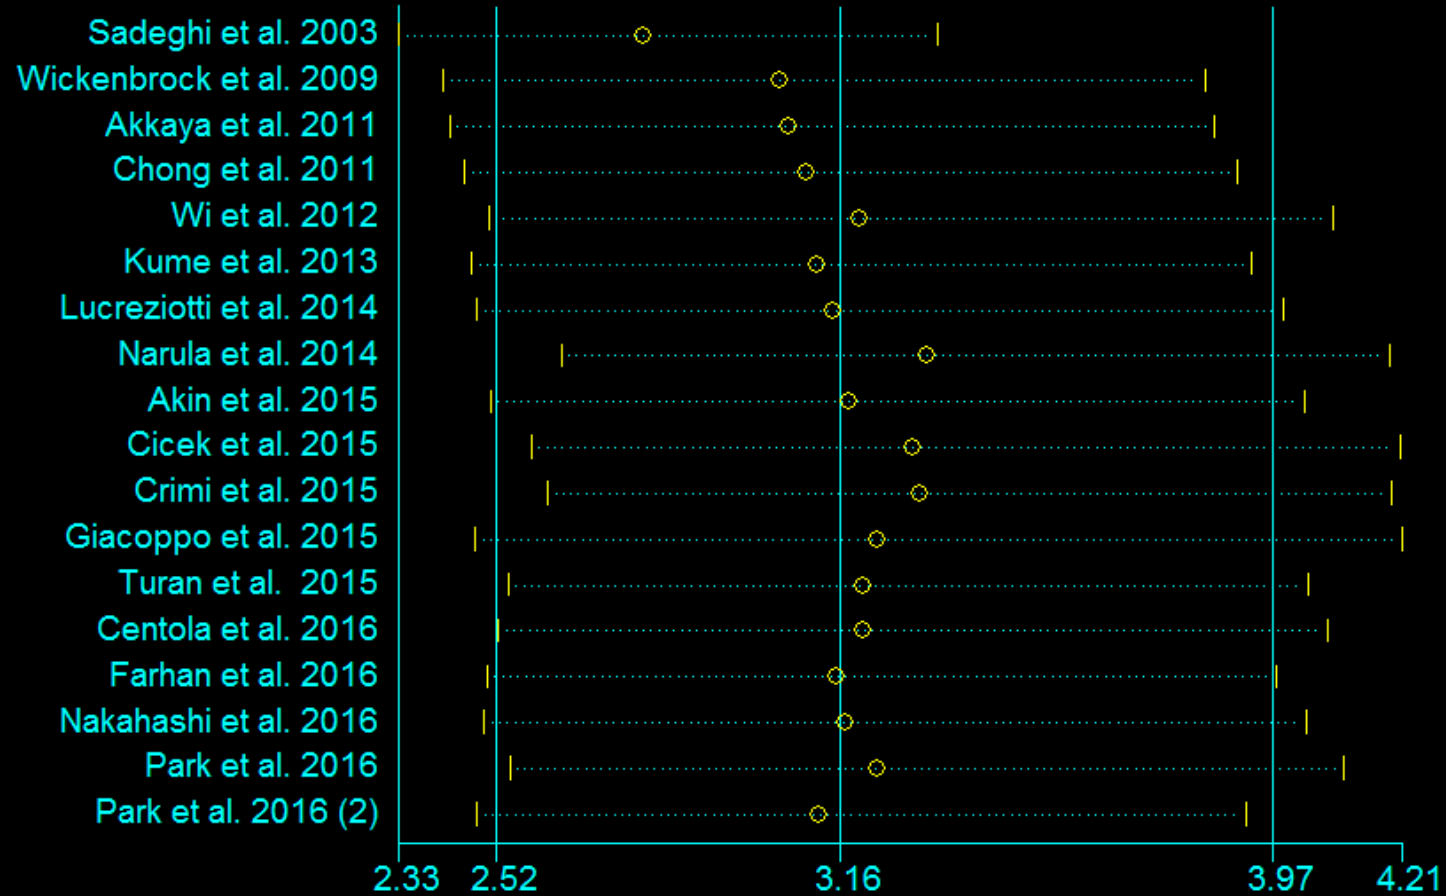

**Additional file 5: Sensitivity analysis for all-cause mortality.**
